# Supplementary material
Source: publisher site journal article supplement (https://www.spandidos-publications.com/1363/downloadSupplementary)

Figure S1. (A) Evaluation of the effects of differential concentration of dimethylsulphoxide (DMSO) on the cell viability. DMSO was used upto 5% v/v for 48-h treatment of HNFs and HKFs. (B) RT-qPCR for STAT3 and GAPDH. The PCR amplification was performed in a real-Time PCR system according to the manufacturer's protocol. All sample measurements were performed in triplicate. Results are presented as  $2^{-\Delta\Delta C_q}$  calculations, where  $\Delta\Delta C_q = (C_t, \text{STAT3}-C_t, \text{GAPDH})_{\text{HNF}} - (C_t, \text{STAT3}-C_t, \text{GAPDH})_{\text{HKF}}$ . (C) Cell proliferation assay using CCK-8. HKFs were transfected with STAT3 specific decoy oligodeoxynucleotides (SODNs) or random oligodeoxynucleotides (MODNs). Untransfected HKFs were used as a medium control. After 24, 48 and 72 h of transfection, cell viability was detected by CCK-8 assay. The OD values at 450 nm were then measured. \* $P < 0.05$ , vs. the control. HNFs, human normal fibroblasts; HKFs, human keloid fibroblasts.

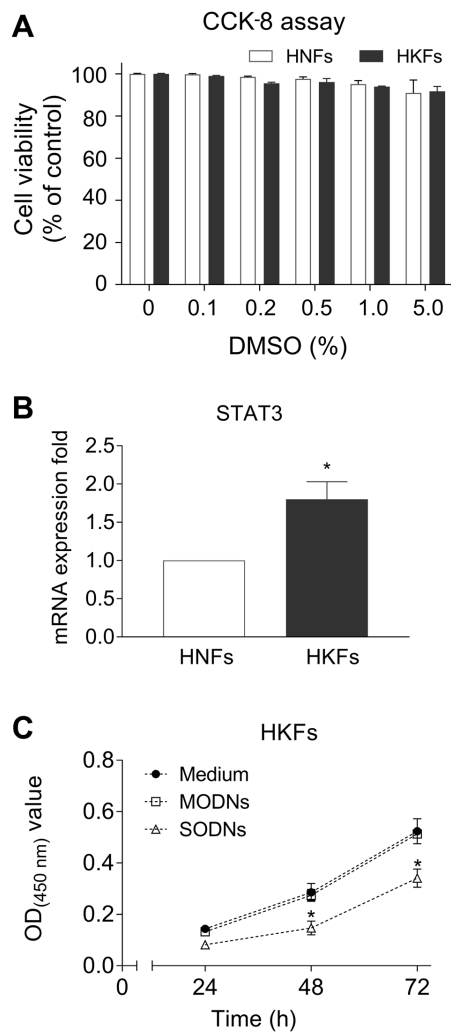

Supplement: Supplementary file 1 [file downloadSupplementary]
